# Supplementary material
Source: MDPI journal article supplement (https://www.mdpi.com/1999-4907/14/9/1705)
Supplement: s1 [file s1]

Supplementary Table S1. Error Matrix table and the Kappa coefficient from the supervised classification

| Nome                   | Tree/shrub | Grass/<br>herbaceous | Bare<br>soil | Roads  | Impervious<br>surface | Shadow | River/<br>Lakes | Pool   | Light<br>tiles | Dark<br>tiles | Grey<br>tiles | Ceramic<br>tiles | Total   | User's<br>accuracy |
|------------------------|------------|----------------------|--------------|--------|-----------------------|--------|-----------------|--------|----------------|---------------|---------------|------------------|---------|--------------------|
| Tree/shrub             | 16.859     | 0                    | 0            | 27     | 0                     | 0      | 2               | 0      | 0              | 0             | 0             | 0                | 16.888  | 99.83%             |
| Grass/herbaceous       | 54         | 22.712               | 0            | 0      | 0                     | 0      | 0               | 0      | 0              | 0             | 0             | 0                | 22.766  | 99.76%             |
| Bare soil              | 0          | 41                   | 15.561       | 0      | 0                     | 0      | 0               | 0      | 0              | 0             | 0             | 493              | 16.095  | 96.68%             |
| Roads                  | 11         | 0                    | 0            | 16.382 | 8                     | 3      | 0               | 0      | 0              | 3             | 0             | 0                | 16.407  | 99.85%             |
| Impervious<br>surface  | 0          | 0                    | 0            | 3      | 4.268                 | 0      | 0               | 0      | 40             | 0             | 1             | 0                | 4.312   | 98.98%             |
| Shadow                 | 0          | 0                    | 0            | 16     | 0                     | 14.769 | 326             | 0      | 0              | 26            | 0             | 0                | 15.137  | 97.57%             |
| River/Lakes            | 0          | 0                    | 0            | 9      | 0                     | 4.616  | 371.854         | 0      | 0              | 12            | 0             | 0                | 376.491 | 98.77%             |
| Pool                   | 0          | 0                    | 0            | 0      | 0                     | 0      | 0               | 5.135  | 0              | 0             | 0             | 0                | 5.135   | 100.00%            |
| Light tiles            | 0          | 0                    | 0            | 0      | 82                    | 0      | 0               | 0      | 5.097          | 0             | 0             | 15               | 5.194   | 98.13%             |
| Dark tiles             | 0          | 1                    | 0            | 45     | 0                     | 12     | 0               | 0      | 0              | 7.168         | 0             | 9                | 7.235   | 99.07%             |
| Grey tiles             | 0          | 0                    | 0            | 0      | 25                    | 0      | 0               | 1      | 0              | 0             | 8.386         | 1                | 8.413   | 99.68%             |
| Ceramic tiles          | 0          | 115                  | 743          | 0      | 0                     | 0      | 0               | 0      | 0              | 0             | 0             | 7.911            | 8.769   | 90.22%             |
| Total                  | 16.924     | 22.869               | 16.304       | 16.482 | 4.383                 | 19.400 | 372.182         | 5.136  | 5.137          | 7.209         | 8.387         | 8.429            | 502.842 |                    |
| Production<br>accuracy | 99.62%     | 99.31%               | 95.44%       | 99.39% | 97.38%                | 76.13% | 99.91%          | 99.98% | 99.22%         | 99.43%        | 99.99%        | 93.85%           | 98.23%  |                    |

Overall accuracy 98.66%      Kappa coefficient 96.94%

Supplementary Table S2. Supervised classification of the 25 districts in São Paulo city

| Regional<br>prefecture | Region | Map<br>legend <sup>1</sup> | Urban<br>forest | Grass/<br>herb | Green<br>spaces | Bare<br>soil | Water | Built<br>spaces | Impervious<br>surface | Population<br>density | Contam.<br>sites | GIP <sup>2</sup> | GBP <sup>3</sup> | Green<br>index | Green<br>quality |
|------------------------|--------|----------------------------|-----------------|----------------|-----------------|--------------|-------|-----------------|-----------------------|-----------------------|------------------|------------------|------------------|----------------|------------------|
| Pirituba               | North  | 1                          | 37.7            | 4.8            | 42.5            | 7.5          | 3.3   | 20.2            | 16.7                  | 8407.2                | 5                | 0.72             | 0.68             | 0.70           | High             |
| Butantã                | West   | 3                          | 33.2            | 5.4            | 38.6            | 9.1          | 5.3   | 21.8            | 15.3                  | 8072.8                | 15               | 0.72             | 0.64             | 0.68           | High             |
| Freguesia              | North  | 2                          | 34.6            | 2.3            | 36.9            | 6.1          | 3.0   | 20.4            | 21.4                  | 12926.9               | 3                | 0.63             | 0.64             | 0.64           | High             |
| Santana                | North  | 4                          | 31.2            | 3.9            | 35.1            | 9.4          | 3.8   | 20.7            | 19.3                  | 9111.0                | 6                | 0.65             | 0.63             | 0.64           | High             |
| Cidade<br>Tiradentes   | East   | 8                          | 24.1            | 13.2           | 37.2            | 11.6         | 2.9   | 23.9            | 19.2                  | 14658.0               | 0                | 0.66             | 0.61             | 0.63           | High             |
| São Mateus             | East   | 7                          | 24.1            | 10.8           | 34.9            | 9.5          | 3.0   | 25.4            | 19.7                  | 9773.5                | 2                | 0.64             | 0.58             | 0.61           | High             |
| Itaquera               | East   | 6                          | 26.9            | 7.1            | 34.1            | 7.8          | 3.0   | 24.6            | 23.0                  | 9827.2                | 11               | 0.60             | 0.58             | 0.59           | High             |
| Casa Verde             | North  | 5                          | 27.2            | 2.3            | 29.5            | 7.3          | 3.7   | 23.0            | 24.4                  | 11235.5               | 10               | 0.55             | 0.56             | 0.55           | High             |
| Santo Amaro            | South  | 9                          | 23.4            | 4.2            | 27.6            | 8.3          | 5.8   | 23.7            | 21.6                  | 6540.9                | 54               | 0.56             | 0.54             | 0.55           | High             |
| Pinheiros              | West   | 11                         | 20.8            | 3.2            | 24.0            | 7.5          | 8.5   | 20.1            | 20.7                  | 9274.2                | 21               | 0.54             | 0.54             | 0.54           | High             |
| Campo<br>Limpo         | South  | 10                         | 22.1            | 4.2            | 26.4            | 8.5          | 3.9   | 28.9            | 21.8                  | 18296.2               | 4                | 0.55             | 0.48             | 0.51           | High             |
| Ipiranga               | South  | 12                         | 18.7            | 3.1            | 21.8            | 9.1          | 3.1   | 26.4            | 28.1                  | 12656.5               | 34               | 0.44             | 0.45             | 0.45           | Moderate         |
| Vila Maria             | North  | 13                         | 15.0            | 2.7            | 17.6            | 9.1          | 7.3   | 23.3            | 25.3                  | 10888.5               | 11               | 0.41             | 0.43             | 0.42           | Moderate         |
| Lapa                   | West   | 14                         | 14.6            | 3.7            | 18.3            | 8.6          | 6.4   | 25.6            | 28.3                  | 8049.0                | 63               | 0.39             | 0.42             | 0.41           | Moderate         |
| Penha                  | East   | 16                         | 11.3            | 8.4            | 19.7            | 10.9         | 2.6   | 28.0            | 30.9                  | 10821.5               | 8                | 0.39             | 0.41             | 0.40           | Moderate         |
| Guaianases             | East   | 18                         | 10.7            | 8.8            | 19.6            | 9.6          | 3.7   | 31.3            | 29.6                  | 15151.9               | 2                | 0.40             | 0.38             | 0.39           | Moderate         |
| Jabaquara              | South  | 15                         | 13.6            | 2.4            | 16.1            | 8.9          | 5.5   | 28.7            | 26.9                  | 15920.2               | 6                | 0.37             | 0.36             | 0.37           | Moderate         |
| São Miguel             | East   | 20                         | 8.5             | 6.7            | 15.2            | 9.3          | 2.7   | 31.8            | 33.8                  | 14645.5               | 3                | 0.31             | 0.32             | 0.32           | Moderate         |

|                |         |    |      |     |      |      |     |      |      |         |    |      |      |      |          |
|----------------|---------|----|------|-----|------|------|-----|------|------|---------|----|------|------|------|----------|
| Ermelino       | East    | 17 | 11.0 | 4.3 | 15.3 | 8.9  | 1.4 | 32.4 | 34.2 | 13542.1 | 5  | 0.31 | 0.32 | 0.31 | Moderate |
| Matarazzo      |         |    |      |     |      |      |     |      |      |         |    |      |      |      |          |
| Sé             | Central | 19 | 8.9  | 2.0 | 10.9 | 6.5  | 7.2 | 22.5 | 33.8 | 17537.3 | 21 | 0.24 | 0.33 | 0.29 | Moderate |
| Aricanduva     | East    | 21 | 8.2  | 3.6 | 11.8 | 12.0 | 4.3 | 29.7 | 33.0 | 12199.9 | 8  | 0.26 | 0.29 | 0.27 | Moderate |
| Vila Mariana   | South   | 22 | 8.1  | 3.2 | 11.3 | 11.1 | 3.4 | 28.6 | 36.6 | 13468.4 | 14 | 0.24 | 0.28 | 0.26 | Moderate |
| Vila Prudente  | East    | 23 | 7.9  | 2.8 | 10.6 | 9.6  | 4.6 | 29.4 | 34.6 | 12320.5 | 10 | 0.23 | 0.27 | 0.25 | Moderate |
| Mooca          | East    | 24 | 7.3  | 2.5 | 9.8  | 10.1 | 5.0 | 27.0 | 35.2 | 10222.8 | 66 | 0.22 | 0.27 | 0.24 | Low      |
| Itaim Paulista | East    | 25 | 6.2  | 4.4 | 10.6 | 9.3  | 3.3 | 34.3 | 36.3 | 17186.0 | 2  | 0.23 | 0.24 | 0.23 | Low      |

<sup>1</sup> Map legend according to urban forest coverage rank

<sup>2</sup> GIP: Green vs. impervious surface proportion

<sup>3</sup> GBP: Green vs. built space proportion
